# Supplementary material
Source: PubMed Central journal article supplement (PMC2755894)
Supplement: supp_M109.028407_Suppldata.pdf [file supp_M109.028407_Suppldata.pdf]

## **SUPPLEMENTARY DATA**

**Supplemental Figure S1. HER2 expression in RGS16-depleted MCF7 cells.** HER2 quantities in lysates of MCF7 cells expressing either scrambled control (shCTL) or RGS16-specific shRNA (shRGS16) were determined by immunoblotting. Equal protein loading was confirmed by blotting with anti- $\beta$ -actin antibody

**Supplementary Figure S2. RGS proteins interact with p85 $\alpha$ .** Immunoassay of HEK293T cells transfected with GFP-tagged RGS1, 4, 5, 13 or 16 together with myc-GFP-p85 $\alpha$ . Lysates were immunoprecipitated with myc antibody followed by immunoblotting with anti-GFP.

**Supplementary Figure S3. Schematic structure of full-length RGS16 and mutants.** RGS box is labeled, and each mutant is bracketed by the amino acids (aa) included.

**Supplementary Figure S4. Diagram of p85 $\alpha$  and mutants.** Schematic structure of p85 $\alpha$  and mutants containing the indicated domain(s) deletion. Function domains are illustrated in the diagram.

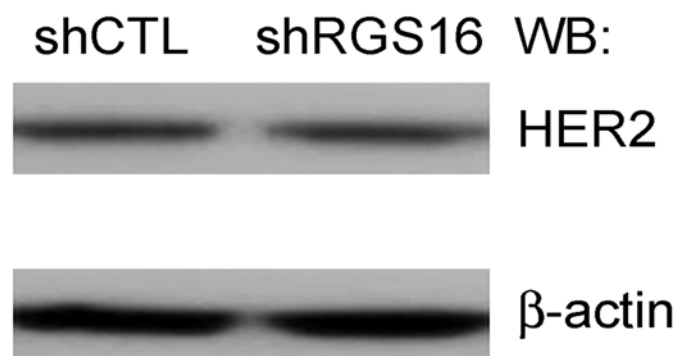

Supplementary Fig. S1  
Liang et al.

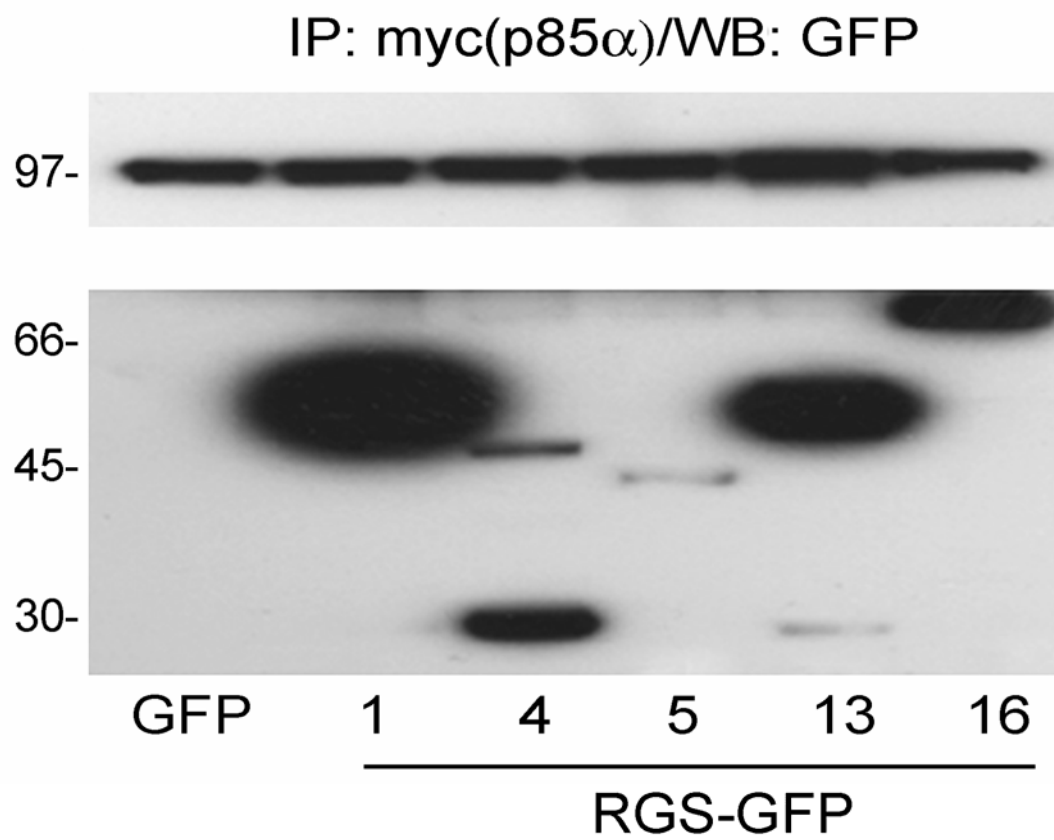

Supplementary Fig. S2  
Liang et al.

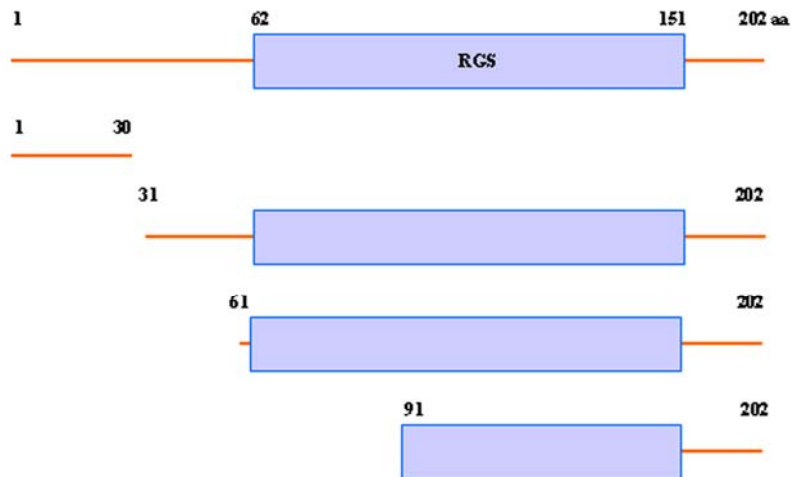

Supplementary Fig. S3  
Liang et al.

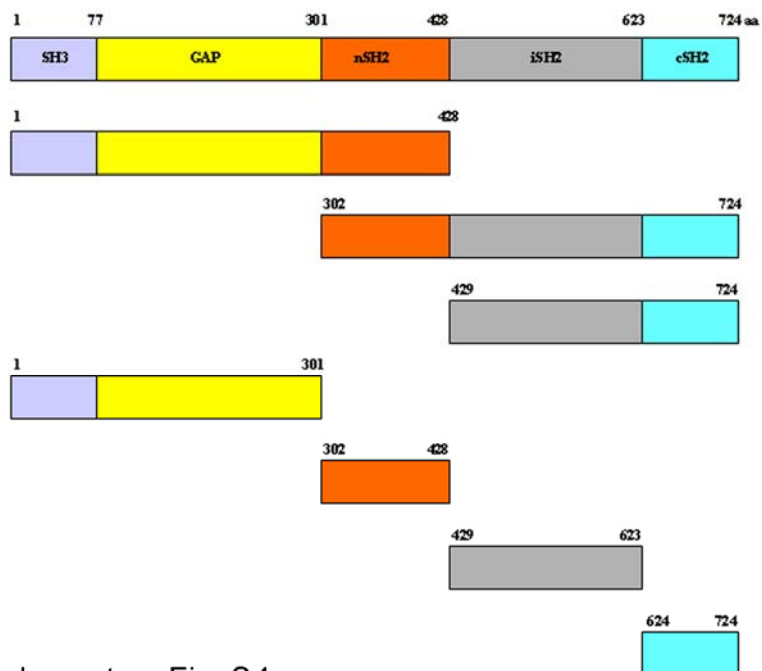

Supplementary Fig. S4  
Liang et al.
